# Supplementary material
Source: PubMed Central journal article supplement (PMC10804279)
Supplement: jama-e2326528-s001.pdf [file jama-e2326528-s001.pdf]

## **Data Sharing Statement**

Adetunji. Premarket Notifications and Patents for Breast Pumps Before and After the ACA. *JAMA*. Published January 22, 2024. doi:10.1001/jama.2023.26528

### **Data**

**Data available:** No
